# Supplementary material for: Optimizing non-invasive radiofrequency hyperthermia treatment for improving drug delivery in 4T1 mouse breast cancer model
Source: PubMed Central journal article supplement (PMC5347121; doi:10.1038/srep43961), 2017-03-13
Supplement: srep43961-s1.pdf [file srep43961-s1.pdf]

## Supplementary

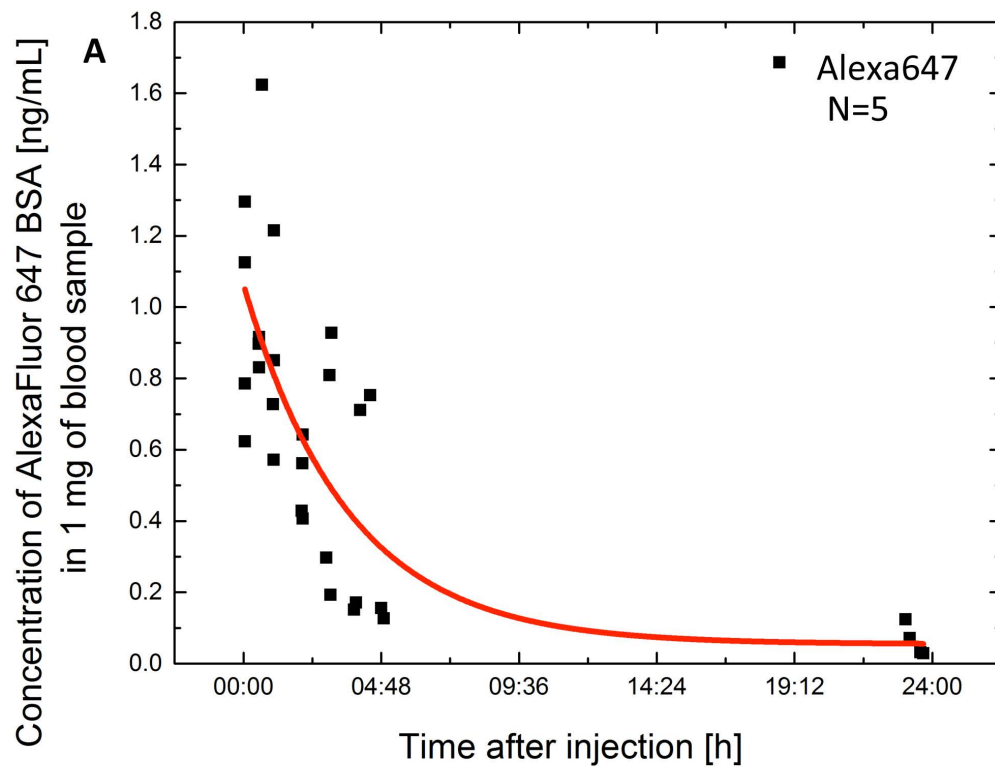

Figure S1: Pharmacokinetics of Alexa647 between 0-24h.

| Target tumor temp. [°C] | HC                                                                                                                                          |                       | RF                                                             |
|-------------------------|---------------------------------------------------------------------------------------------------------------------------------------------|-----------------------|----------------------------------------------------------------|
|                         | Aim for superficial tumor temp. [°C]                                                                                                        | Water bath temp. [°C] | Aim for superficial tumor temp. [°C]                           |
| 37                      | 37-38                                                                                                                                       | 39-40                 | 37                                                             |
| 39                      | 41                                                                                                                                          | 44-45                 | 39                                                             |
| 41                      | 44-45                                                                                                                                       | 48                    | 41                                                             |
| 43                      | 48                                                                                                                                          | 51-53                 | 43                                                             |
| Side effects:           | <ul style="list-style-type: none"> <li>Burns on tumor surface</li> <li>Big heat differential</li> <li>Surrounding tissue heating</li> </ul> |                       | <ul style="list-style-type: none"> <li>Random burns</li> </ul> |

**Table S1:** Table outlining the temperatures and some issues arising during heating regimens.

|           |       | Temperature vs ... |      |      |      | Irradiation time vs ... |        |
|-----------|-------|--------------------|------|------|------|-------------------------|--------|
|           |       | 37°C               | 39°C | 41°C | 43°C | 10 min                  | 30 min |
| NHC vs RF | 0.029 | 0.57               | 1    | 1    | 0.23 | 0.15                    | 1      |
| NHC vs HC | 0.092 | 1                  | 1    | 1    | 0.27 | 1                       | 1      |
| HC vs RF  | 1.00  | 1                  | 1    | 1    | 1    | 1                       | 1      |

**Table S2:** The p values for significance between treatment, temperature and time influence during RF exposure (n=139).

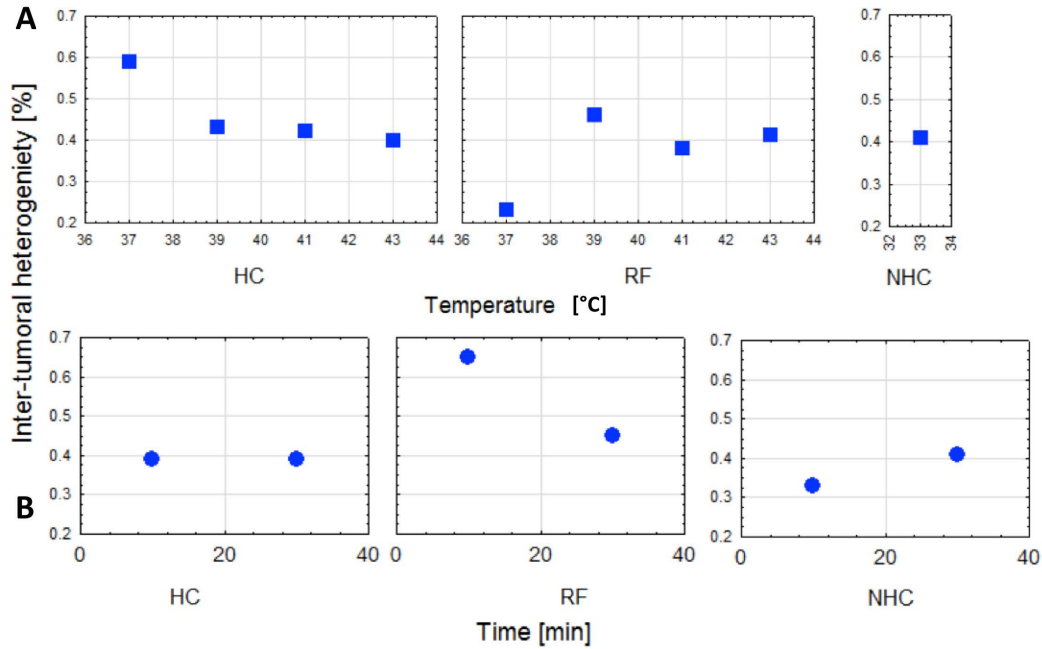

**Figure S2: Inter-tumoral heterogeneity of dye accumulation after treatment calculated as a relation between mean accumulation and group standard deviation.** A) Inter-tumoral heterogeneity of dye accumulation after treatment as a function of temperature. B) Inter-tumoral heterogeneity of dye accumulation after treatment as a function of time.

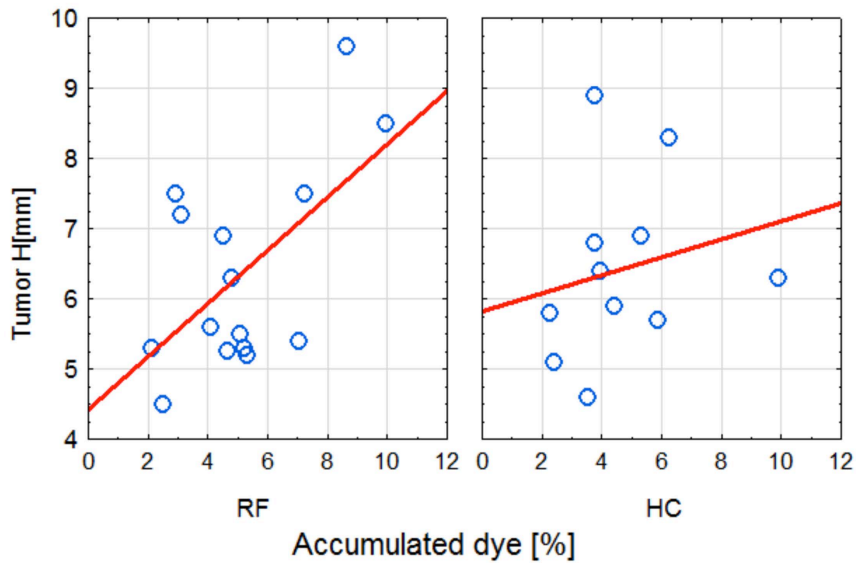

**Figure S3: Selected example of correlation between tumor height and dye accumulation (41° C for 30 min).** (RF, slope = 0.3796,  $r = 0.5911$ ,  $p=0.0203$ ,  $r^2 = 0.3494$ . HC, slope = 0.1281,  $r = 0.2154$ ,  $p=0.5247$ ,  $r^2 = 0.0464$ )
